# Supplementary material for: Neutrophil Extracellular Traps in Airway Diseases: Pathological Roles and Therapeutic Implications
Source: MDPI journal article supplement (doi:10.3390/ijms24055034), 2023-03-06
Supplement: s1 [file s1]

**PRISMA 2020 flow diagram for new systematic reviews which included searches of databases and registers only**

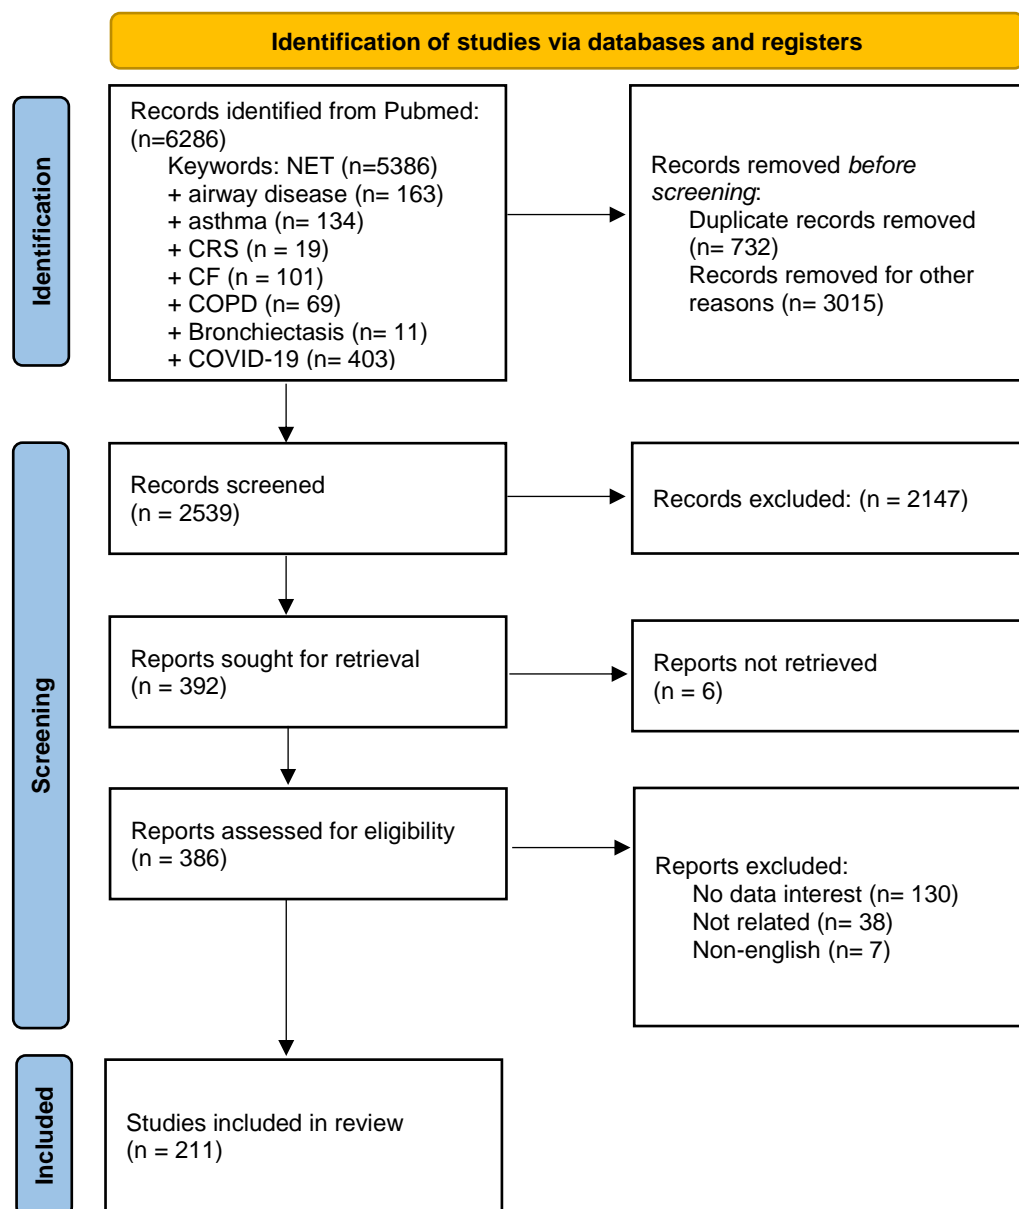

From: Page MJ, McKenzie JE, Bossuyt PM, Boutron I, Hoffmann TC, Mulrow CD, et al. The PRISMA 2020 statement: an updated guideline for reporting systematic reviews. BMJ 2021;372:n71. doi: 10.1136/bmj.n71

For more information, visit: <http://www.prisma-statement.org/>

Supplementary Figure S1. A flowchart summarized the study selection process in line with the PRISMA 2020 statement.
